# Supplementary material
Source: Royal Society of Chemistry journal article supplement (doi:10.1039/d6an00434b)
Supplement: d6an00434b1.pdf [file d6an00434b1.pdf]

## Supporting Information

### Ultrasensitive Triple-Mode Nile Red-L64 Niosome Nanothermometers for Real-Time Cellular Thermogenesis Mapping

Ronak Lazarus,<sup>a</sup> Rupal Kothari,<sup>a</sup> Venkata Vamsi Krishna Venuganti<sup>b</sup> and Amit Nag<sup>\*a</sup>

<sup>a</sup>Department of Chemistry, BITS-Pilani Hyderabad Campus, Hyderabad, India -500078

<sup>b</sup>Department of Pharmacy, BITS-Pilani Hyderabad Campus, Hyderabad, India -500078

E-mail: amitnag@hyderabad.bits-pilani.ac.in

#### Contents:

**Figure S1. Fluorescence spectra of the Interaction of Nile Red and glucose in cell media at 37°C over a period of one hour.**

**Figure S2. The lifetime of only Nile Red in cell media at different temperatures.**

**Table S1: The lifetime decay of only Nile Red in cell media at different temperatures.**

**Table S2: the lifetime decay values of NRL-64 in cell media at different temperatures**

**Table S3: The lifetime decay values of NR-L64 in live cells at different temperatures.**

**Table S4: the lifetime decay values of NR with glucose at different time intervals**

**Method S1. Two-photon power-dependent intensity of NR-L64 loaded in cells.**

**Figure S3. Two-photon power-dependent intensity of NR-L64 loaded in cells.**

**Table S5: Mean fluorescence intensity of NR-L64 niosomes loaded in FaDu cells irradiated under a two-photon fluorescence microscope at 37 °C and 39 °C for 70 min.**

**Method S2. Thermal monitoring of cell metabolism using confocal and multiphoton imaging**

**Table S6: Calculation of relative sensitivity from average fluorescence intensity obtained from the confocal calibration experiment.**

**Table S7: Calculation of relative sensitivity from average fluorescence intensity obtained from the Two-photon calibration experiment.**

**Table S8: Calculation of relative sensitivity from the average fluorescence lifetime obtained from the fluorescence lifetime calibration experiment.**

**Method S3. Average Fluorescence intensity calculation from confocal and Two- photon microscope images using LAS X software**

**Figure S4: Confocal image showing the ROI of cells taken for calibration calculations and their corresponding fluorescence mean intensity values at different temperatures.**

**Figure S5: Confocal image showing the ROI of the cells after glucose addition and their corresponding fluorescence mean intensity values at different time intervals.**

**Figure S6: Two-photon Fluorescence intensity image showing the ROI of cells taken for calibration calculations and their corresponding fluorescence mean intensity values at different temperatures.**

**Figure S7: Two-photon Fluorescence intensity image showing the ROI of the cells after glucose addition and their corresponding fluorescence mean intensity values at different time intervals.**

**Method S4: TauModes for the quantification of the average fluorescence lifetime from the Two-photon microscope images using LAS X software**

**Figure S8: Two-photon Fluorescence lifetime image showing the ROI of cells taken for calibration calculations and their corresponding fluorescence lifetime values at different temperatures.**

**Figure S9: Two-photon Fluorescence lifetime image showing the ROI of the cells after glucose addition and their corresponding fluorescence lifetime values at different time intervals.**

**Figure S10: TPFM images of (a) only Nile red in cells at different temperatures, and (b) only L64 niosomes in cells at 37°C.**

**Figure S11. Fluorescence response of Nile Red–L64 (at 37 °C and 39 °C) in the presence of common intracellular interferents (metal ions, anions, and biothiols), each at 10 mM.**

**Figure S12: (a) Two-photon fluorescence calibration curve obtained from NR-L64 in live FaDu cells, and (b) Two-photon average fluorescence intensity obtained after glucose addition in live FaDu cells at lower laser power (1 mW).**

**Figure S13: (a) Two-photon fluorescence calibration curve obtained from NR-L64 in live FaDu cells, and (b) Two-photon average fluorescence intensity obtained after glucose addition in live FaDu cells at higher laser power (4 mW).**



|    |     |     |       |       |       |       |       |       |
|----|-----|-----|-------|-------|-------|-------|-------|-------|
|    |     |     |       |       |       |       |       | (ns)  |
| 20 | 510 | 618 | 0.101 | 2.189 | 0.955 | 0.044 | 1.013 | 0.194 |
| 25 | 510 | 618 | 0.110 | 2.176 | 0.953 | 0.046 | 0.957 | 0.207 |
| 30 | 510 | 618 | 0.126 | 2.208 | 0.946 | 0.053 | 0.925 | 0.238 |
| 35 | 510 | 618 | 0.138 | 2.207 | 0.941 | 0.058 | 0.955 | 0.260 |
| 36 | 510 | 618 | 0.138 | 2.203 | 0.942 | 0.057 | 0.901 | 0.257 |
| 37 | 510 | 618 | 0.140 | 2.206 | 0.940 | 0.059 | 0.908 | 0.263 |
| 40 | 510 | 618 | 0.151 | 2.199 | 0.938 | 0.061 | 0.966 | 0.278 |

**Table S2: the lifetime decay values of NRL64 in cell media at different temperatures**

| Temperature (°C) | $\lambda_{ex}$<br>(nm) | $\lambda_{em}$<br>(nm) | $\tau_1$<br>(ns) | $\tau_2$<br>(ns) | $\alpha_1$ | $\alpha_2$ | $\chi^2$ | Average lifetime<br>(ns) |
|------------------|------------------------|------------------------|------------------|------------------|------------|------------|----------|--------------------------|
| 37               | 510                    | 618                    | 0.122            | 1.920            | 0.940      | 0.059      | 0.961    | 0.229                    |
| 38               | 510                    | 618                    | 0.165            | 2.107            | 0.911      | 0.088      | 1.200    | 0.336                    |
| 39               | 510                    | 618                    | 0.177            | 2.210            | 0.889      | 0.110      | 1.085    | 0.402                    |
| 40               | 510                    | 618                    | 0.249            | 2.570            | 0.779      | 0.220      | 1.185    | 0.760                    |

**Table S3: The lifetime decay values of NR-L64 in live cells at different temperatures.**

| Temperature (°C) | $\lambda_{ex}$<br>(nm) | $\lambda_{em}$<br>(nm) | $\tau_1$<br>(ns) | $\tau_2$<br>(ns) | $\alpha_1$ | $\alpha_2$ | $\chi^2$ | Average lifetime<br>(ns) |
|------------------|------------------------|------------------------|------------------|------------------|------------|------------|----------|--------------------------|
| 37               | 510                    | 618                    | 0.263            | 4.260            | 0.485      | 0.514      | 1.07     | 2.318                    |
| 37.4             | 510                    | 618                    | 0.247            | 4.269            | 0.500      | 0.499      | 0.996    | 2.256                    |
| 37.8             | 510                    | 618                    | 0.248            | 4.250            | 0.509      | 0.490      | 0.992    | 2.211                    |
| 38.2             | 510                    | 618                    | 0.231            | 4.257            | 0.502      | 0.479      | 1.092    | 2.162                    |
| 38.6             | 510                    | 618                    | 0.231            | 4.181            | 0.521      | 0.478      | 1.059    | 2.119                    |
| 39               | 510                    | 618                    | 0.230            | 4.181            | 0.558      | 0.441      | 1.075    | 1.972                    |
| 39.4             | 510                    | 618                    | 0.234            | 4.143            | 0.550      | 0.449      | 1.120    | 1.990                    |
| 39.8             | 510                    | 618                    | 0.255            | 4.266            | 0.569      | 0.430      | 0.939    | 1.980                    |

**Table S4: the lifetime decay values of NR with glucose at different time intervals**

| Temperature (°C) | $\lambda_{ex}$<br>(nm) | $\lambda_{em}$<br>(nm) | $\tau_1$<br>(ns) | $\tau_2$<br>(ns) | $\alpha_1$ | $\alpha_2$ | $\chi^2$ | Average lifetime<br>(ns) |
|------------------|------------------------|------------------------|------------------|------------------|------------|------------|----------|--------------------------|
| 5                | 510                    | 618                    | 0.1              | 2.119            | 0.969      | 0.030      | 0.859    | 0.16                     |

|    |     |     |       |       |       |       |       |       |
|----|-----|-----|-------|-------|-------|-------|-------|-------|
| 10 | 510 | 618 | 0.122 | 2.189 | 0.962 | 0.037 | 0.853 | 0.199 |
| 15 | 510 | 618 | 0.118 | 2.097 | 0.964 | 0.035 | 0.938 | 0.188 |
| 20 | 510 | 618 | 0.126 | 2.214 | 0.965 | 0.034 | 0.866 | 0.199 |
| 25 | 510 | 618 | 0.115 | 2.196 | 0.964 | 0.035 | 0.864 | 0.188 |
| 30 | 510 | 618 | 0.140 | 2.247 | 0.960 | 0.039 | 0.833 | 0.222 |
| 35 | 510 | 618 | 0.127 | 2.145 | 0.963 | 0.036 | 1.124 | 0.200 |
| 40 | 510 | 618 | 0.128 | 2.301 | 0.966 | 0.033 | 0.990 | 0.200 |
| 45 | 510 | 618 | 0.142 | 2.236 | 0.959 | 0.040 | 0.925 | 0.226 |
| 50 | 510 | 618 | 0.125 | 2.216 | 0.963 | 0.036 | 0.973 | 0.202 |
| 55 | 510 | 618 | 0.126 | 2.144 | 0.963 | 0.036 | 1.008 | 0.199 |
| 60 | 510 | 618 | 0.114 | 2.126 | 0.965 | 0.034 | 0.928 | 0.183 |

### Method S1. Two-photon power-dependent intensity of NR-L64 loaded in cells.

To confirm the nonlinear (quadratic) nature of two-photon excitation, the relationship between fluorescence intensity and excitation laser power was investigated. NR-L64 was loaded in cells and their fluorescence images were acquired at varying laser powers, and the total fluorescence intensity in each image was measured by taking the region of interest (ROI) of the probe in the cells at different laser powers. Both the fluorescence intensity and laser power values were plotted on a log-log scale ( $\log_{10}$  of fluorescence intensity versus  $\log_{10}$  of laser power). Linear regression of the data yielded a slope of approximately 1.74, consistent with the expected near-quadratic dependence for two-photon excitation. This provides strong evidence that the observed fluorescence of NR-L64 in FaDu cells arises predominantly from a two-photon absorption process.

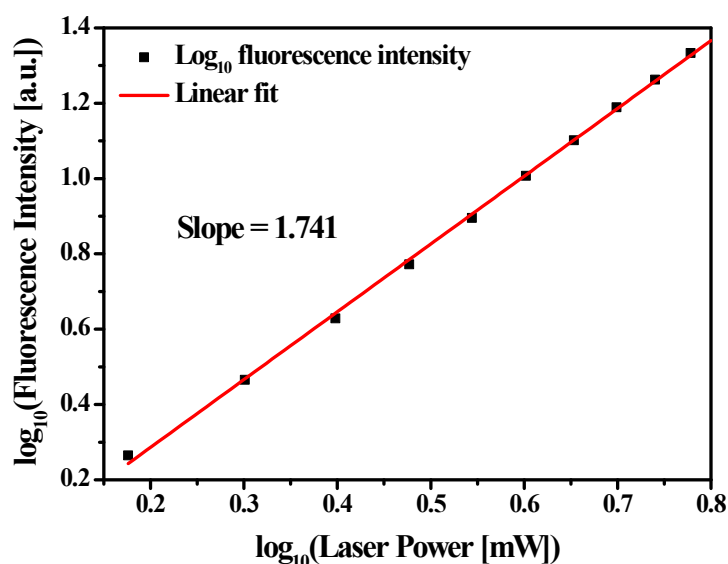

**Figure S3.** Two-photon power-dependent intensity of NR-L64 loaded in cells.

**Table S5: Mean fluorescence intensity of NR-L64 niosomes loaded in FaDu cells irradiated under a two-photon fluorescence microscope at 37 °C and 39 °C for 70 min.**

| Time (min) | Average fluorescence | Average fluorescence |
|------------|----------------------|----------------------|
|------------|----------------------|----------------------|

|    | intensity at 37 °C | intensity at 39 °C |
|----|--------------------|--------------------|
| 0  | 18.65              | 54.58              |
| 5  | 18.7               | 54.96              |
| 10 | 18.95              | 53.99              |
| 15 | 19.03              | 55.16              |
| 20 | 18.59              | 54.73              |
| 25 | 18.49              | 55.52              |
| 30 | 18.71              | 55.4               |
| 35 | 18.72              | 54.56              |
| 40 | 18.43              | 54.63              |
| 45 | 18.5               | 53.98              |
| 50 | 18.57              | 53.97              |
| 55 | 18.84              | 54.05              |
| 60 | 18.59              | 54.96              |
| 65 | 19.1               | 55.18              |
| 70 | 19.05              | 55.07              |

## **Method S2. Thermal monitoring of cell metabolism using confocal and multiphoton imaging**

FaDu cells were seeded in confocal petri dishes ( $50 \times 10^3$  cells/dish) and cultured for 24 h at 37 °C under 95% relative humidity and 5% CO<sub>2</sub>. The cells were then incubated for 2 h with NR-L64 ( $1.25 \times 10^{-5}$  M NR), suspended in EMEM supplemented with 10% FBS, based on our previous cell viability studies. After incubation, the cells were washed and resuspended in fresh 10% FBS-containing EMEM.

Cellular metabolism was stimulated by adding 1 mL of glucose solution ( $5 \text{ mg mL}^{-1}$ ) to the culture medium, mimicking hyperglycemic conditions in the cell. Once taken up by the cells, glucose undergoes glycolysis to generate pyruvate, which either enters the mitochondria to fuel oxidative phosphorylation or is converted into lactate, with both pathways contributing to energy production<sup>1</sup>. A parallel group containing only NR-L64 was used to obtain the calibration curve. Fluorescence intensity changes of NR-L64 in response to cellular metabolism were monitored using confocal laser scanning microscopy (LSCM) and two-photon fluorescence and lifetime microscopy. For confocal imaging, NR-l64 in live FaDu was excited at 514 nm, and emission was collected between 610–670 nm. For two-photon imaging, 825 nm excitation was used, and emission was recorded using a 580–632 nm band pass filter. Calibration was achieved by recording fluorescence and lifetime images between 37–39 °C in 0.2 °C increments. For experimental measurements, glucose-treated cells were observed for 60 min, with fluorescence images captured every 5 min at 20× magnification. The fluorescence

intensity and lifetime values were obtained from the images by taking a region of interest (ROI) from the cells (as described in methods S3 and S4). Temperature was precisely maintained using a controller (H301-EC-M, OKO Laboratories) with an accuracy of  $\pm 0.1$  °C.

**Table S6: Calculation of relative sensitivity from average fluorescence intensity obtained from the confocal calibration experiment.**

| Temperature (°C) | Average Fluorescence Intensity (Q) | d(Q)    | Relative sensitivity (Sr) |
|------------------|------------------------------------|---------|---------------------------|
| 37.2             | 0.05035                            | 0.00185 | 18.37                     |
| 37.4             | 0.05251                            | 0.00216 | 20.56                     |
| 37.6             | 0.06252                            | 0.01001 | 80.05                     |
| 37.8             | 0.06739                            | 0.01001 | 74.26                     |
| 38               | 0.07685                            | 0.01446 | 94.07                     |
| 38.2             | 0.09639                            | 0.01954 | 101.35                    |
| 38.4             | 0.10658                            | 0.01019 | 47.80                     |
| 38.6             | 0.11148                            | 0.0049  | 21.97                     |
| 38.8             | 0.12171                            | 0.01023 | 42.02                     |
| 39               | 0.14171                            | 0.02    | 70.56                     |

**Table S7: Calculation of relative sensitivity from average fluorescence intensity obtained from the Two-photon calibration experiment.**

| Temperature (°C) | Average Fluorescence Intensity (Q) | d(Q)    | Relative sensitivity (Sr) |
|------------------|------------------------------------|---------|---------------------------|
| 37.2             | 0.15506                            | 0.00891 | 28.73                     |
| 37.4             | 0.15685                            | 0.00179 | 5.70                      |
| 37.6             | 0.16566                            | 0.00881 | 26.59                     |
| 37.8             | 0.17081                            | 0.00515 | 15.07                     |
| 38               | 0.1847                             | 0.01389 | 37.60                     |
| 38.2             | 0.23525                            | 0.05055 | 107.43                    |
| 38.4             | 0.27959                            | 0.04434 | 79.29                     |
| 38.6             | 0.30678                            | 0.02719 | 44.31                     |
| 38.8             | 0.32419                            | 0.01741 | 26.85                     |
| 39               | 0.35419                            | 0.03    | 42.35                     |

**Table S8: Calculation of relative sensitivity from the average fluorescence lifetime obtained from the fluorescence lifetime calibration experiment.**

| Temperature (°C) | Average Fluorescence Lifetime (Q) | d(Q) | Relative sensitivity (Sr) |
|------------------|-----------------------------------|------|---------------------------|
| 37.2             | 3.278689                          | 0.02 | 3.278689                  |
| 37.4             | 3.30033                           | 0.02 | 3.30033                   |
| 37.6             | 5                                 | 0.03 | 5                         |
| 37.8             | 1.672241                          | 0.01 | 1.672241                  |
| 38               | 1.677852                          | 0.01 | 1.677852                  |
| 38.2             | 6.802721                          | 0.04 | 6.802721                  |
| 38.4             | 3.424658                          | 0.02 | 3.424658                  |
| 38.6             | 1.706485                          | 0.01 | 1.70648                   |
| 38.8             | 1.70068                           | 0.01 | 1.70068                   |

**Method S3. Average Fluorescence intensity calculation from confocal and Two- photon microscope images using LAS X software**

The confocal images of NR-L64 in cells were taken using leica confocal microscope (TCS SP8, Leica Microsystems, Germany) and the Two-photon images in cells were taken using Leica SP8 microscope coupled with a Chameleon Vision II femtosecond Ti: Sapphire oscillator. To calculate the average fluorescence intensity from the images, LAS X software from Leica was used. The images were opened in the quantification window of the software and from the tools tab “Histogram” was selected which determines the distribution of gray-scale values in images and in the individual images of image series based on regions of interest (ROI). The region of interest (ROI) was drawn around different cells present in the image using the “draw polygon” feature present in the tool bar. The mean intensity of each ROI was obtained from the statistics window of the software which corresponds to the fluorescence intensity obtained from that particular cell as highlighted in figures (S6, S7, S8 and S9), to calculate the average fluorescence intensity the mean intensity of each cell was divided by the ROI area of that particular cell to get the average fluorescence intensity per area. The average fluorescence intensity per area of multiple cells were taken in a image and their mean value was used as the average fluorescence intensity of that particular image as given in table S5 and S6.

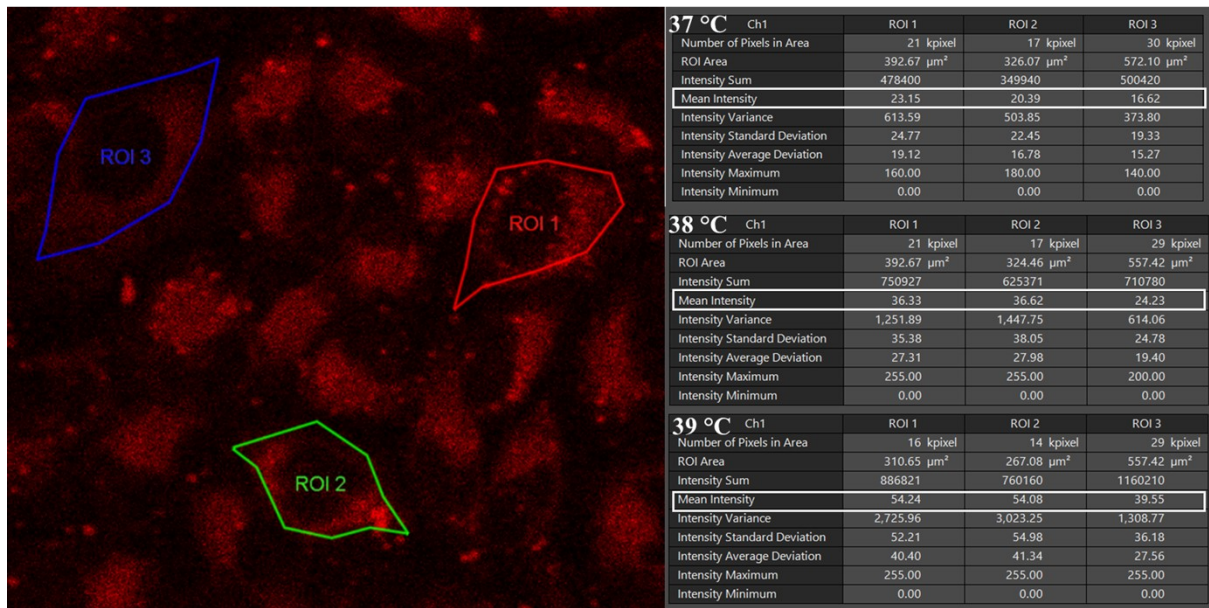

**Figure S4: Confocal image (only at 37°C is shown) showing the ROI of cells taken for calibration calculations and their corresponding fluorescence mean intensity values at different temperatures.**

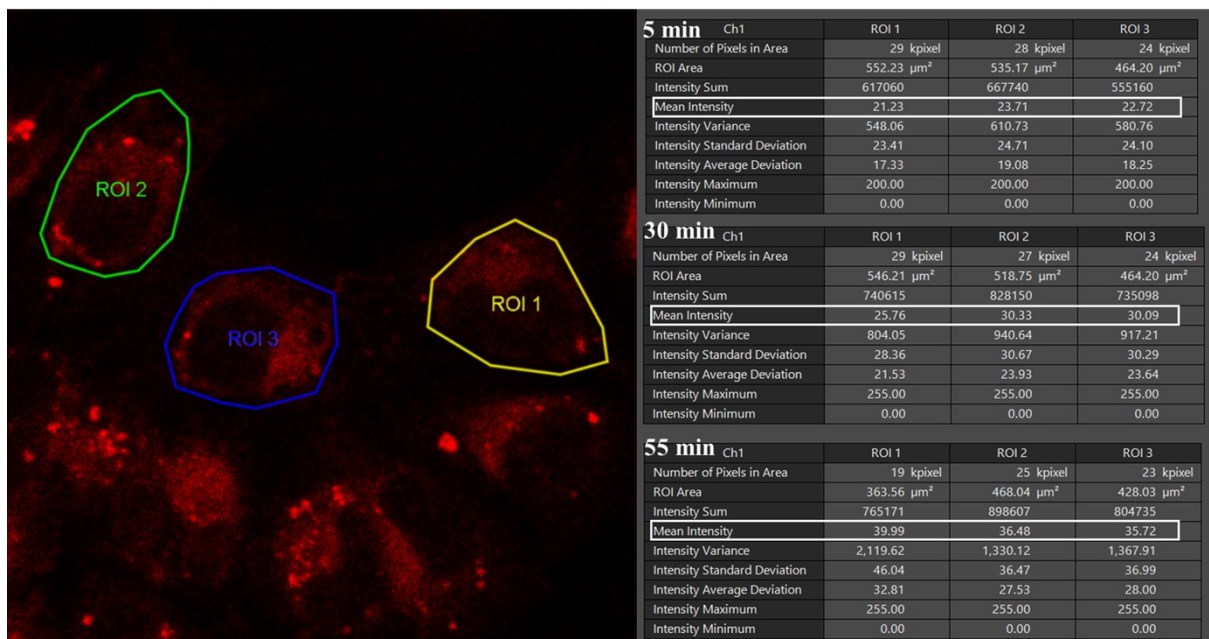

**Figure S5: Confocal image (after 55 min is shown) showing the ROI of the cells after glucose addition and their corresponding fluorescence mean intensity values at different time intervals.**

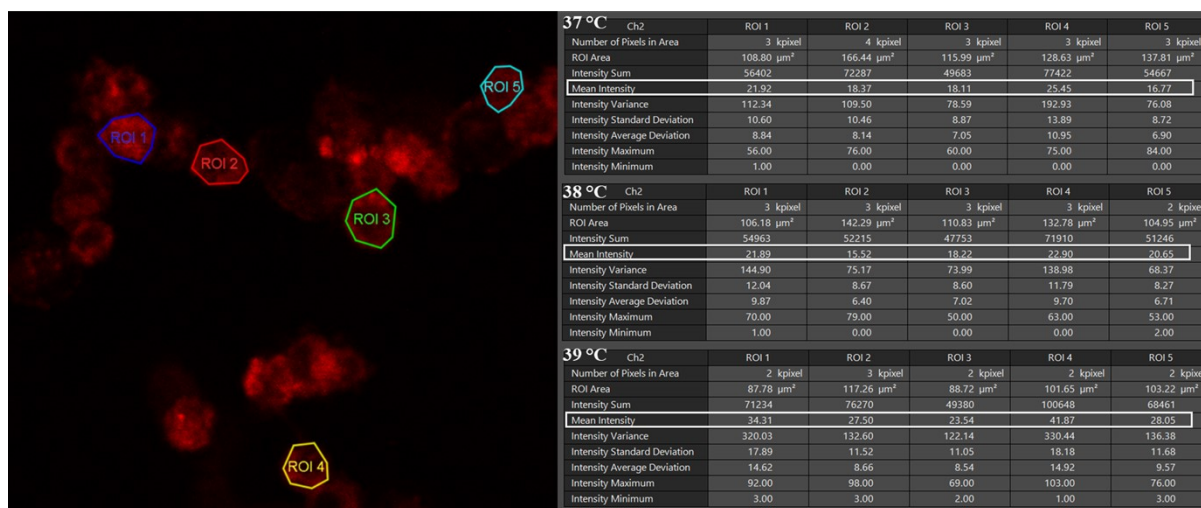

**Figure S6: TPFM image (only at 37°C is shown) showing the ROI of cells taken for calibration calculations and their corresponding fluorescence mean intensity values at different temperatures.**

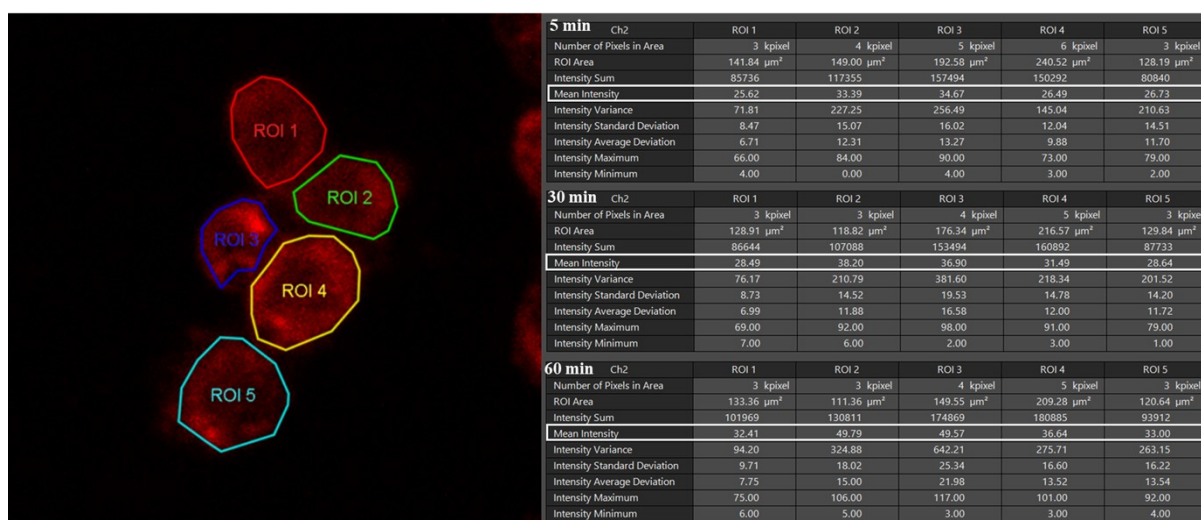

**Figure S7: TPFM image (after 60 min is shown) showing the ROI of the cells after glucose addition and their corresponding fluorescence mean intensity values at different time intervals.**

**Method S4: TauModes for the quantification of the average fluorescence lifetime from the Two- photon microscope images using LAS X software**

The Fluorescence lifetime images in cells were taken using a Leica SP8 microscope coupled with a Chameleon Vision II femtosecond Ti: Sapphire oscillator. To visualize the fluorescence lifetime in images taken with the Leica microscope, the Leica system provides different

TauModes and a TauContrast function. The TauContrast provides the average photon arrival time per pixel in the detector and displays it as a color-lifetime image (figures S10 and S11). In the TauModes feature, the Tau Intensity feature was selected, which gives the full photon arrival time intensity image. To calculate the average fluorescence lifetime from the images, a process similar to that described in Method S3 was used. The region of interest (ROI) was drawn around different cells present in the image using the “draw polygon” feature present in the toolbar. The “mean weighted arrival time” of each ROI was obtained from the statistics window of the software which corresponds to the average fluorescence lifetime obtained from that particular cell as highlighted in figures (S10, and S11), to calculate the average fluorescence lifetime the “mean weighted arrival time” of multiple cells were taken in an image and their mean value was calculated as the average fluorescence lifetime of that particular image as given in Table S7.

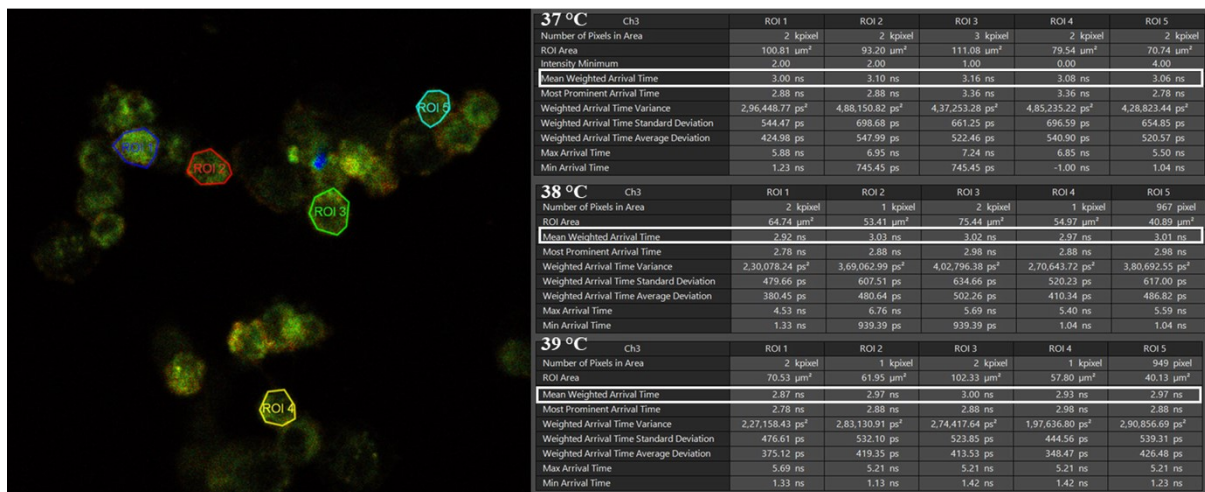

**Figure S8: Two-photon Fluorescence lifetime image (only at 37°C is shown) showing the ROI of cells taken for calibration calculations and their corresponding fluorescence lifetime values at different temperatures.**

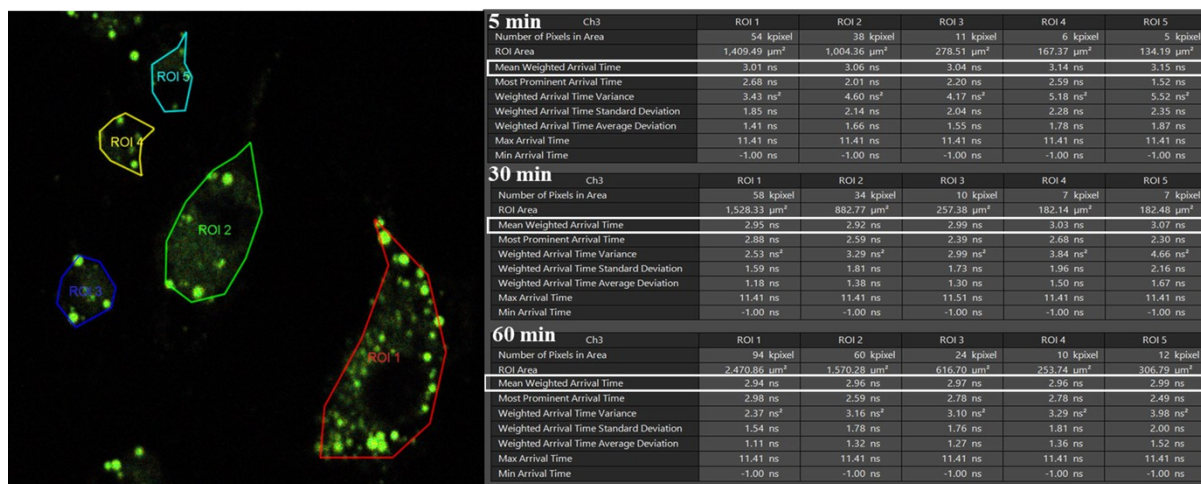

**Figure S9: Two-photon Fluorescence lifetime image (after 60 min is shown) showing the ROI of the cells after glucose addition and their corresponding fluorescence lifetime values at different time intervals.**

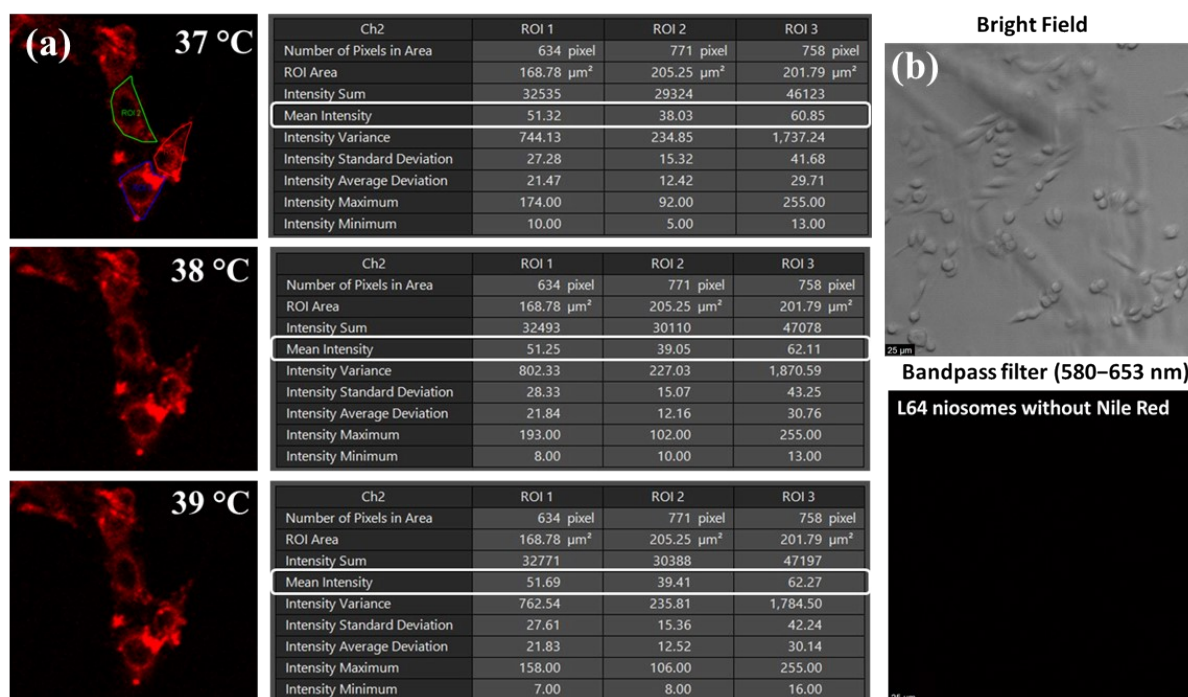

**Figure S10: TPFM images of (a) only Nile red in cells at different temperatures, and (b) only L64 niosomes in cells at 37°C.**

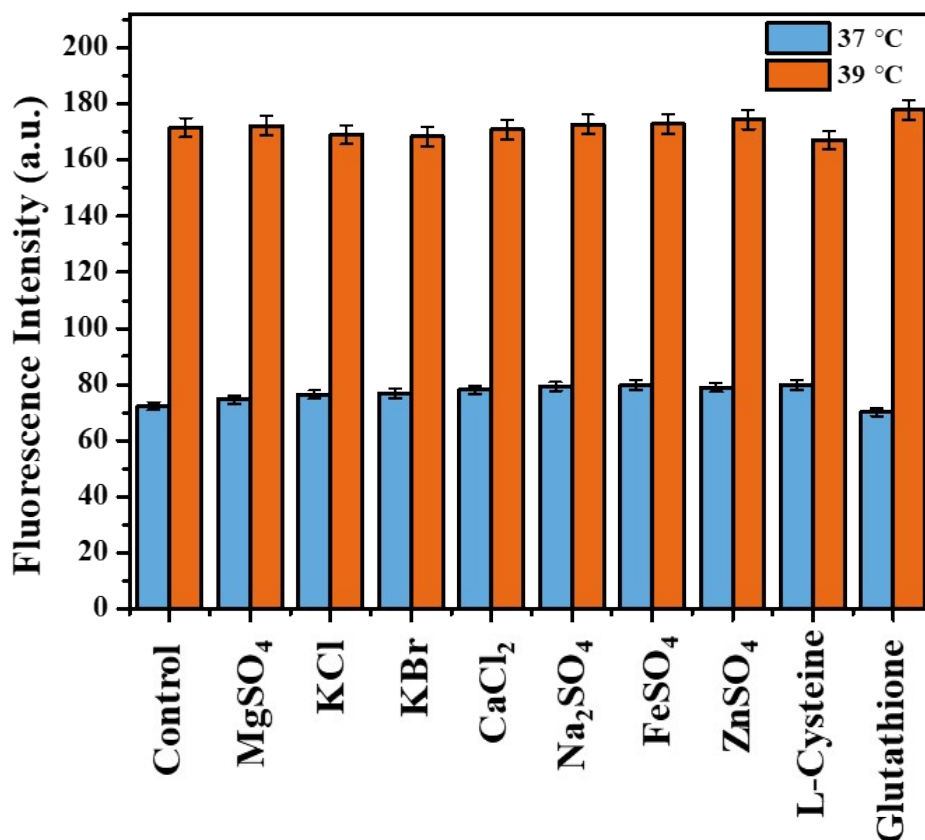

**Figure S11.** Fluorescence response of Nile Red-L64 (at 37 °C and 39 °C) in the presence of common intracellular interferents (metal ions, anions, and biothiols), each at 10 mM. Control: Without any interferents.

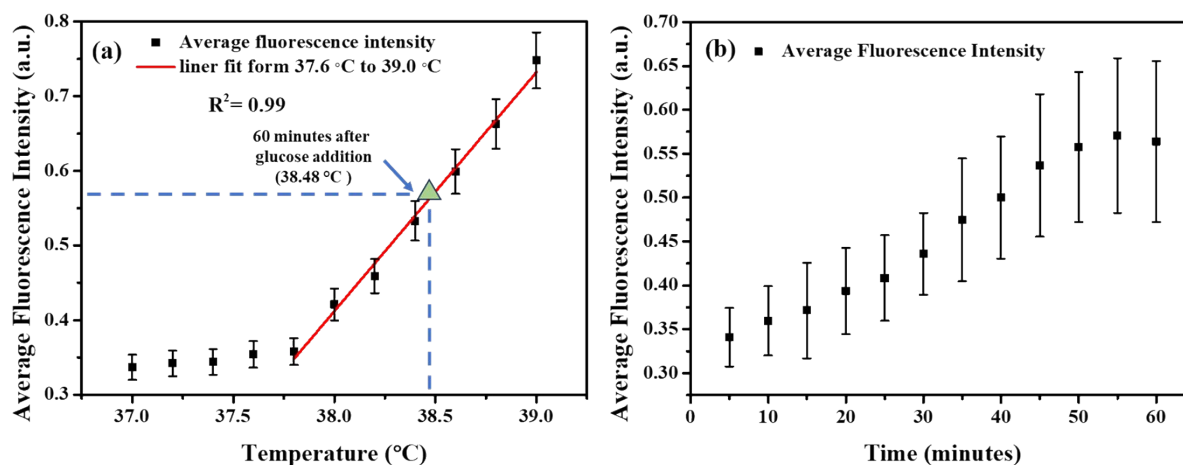

**Figure S12:** (a) Two-photon fluorescence calibration curve obtained from NR-L64 in live FaDu cells, and (b) Two-photon average fluorescence intensity obtained after glucose addition in live FaDu cells at lower laser power (1 mW).

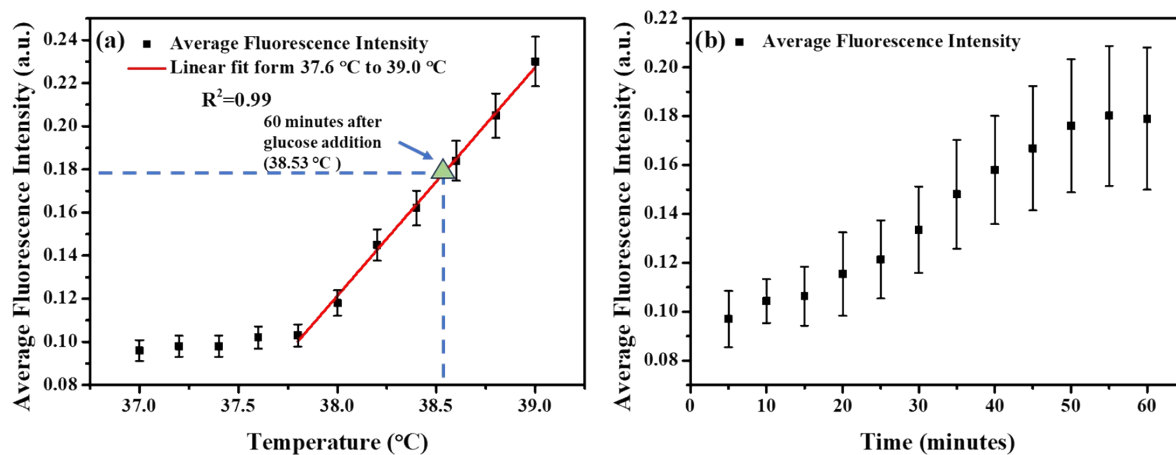

**Figure S13: (a) Two-photon fluorescence calibration curve obtained from NR-L64 in live FaDu cells, and (b) Two-photon average fluorescence intensity obtained after glucose addition in live FaDu cells at higher laser power (4 mW).**

#### References:

1. S. J. Kierans and C. T Taylor, *J. Biol. Chem.*, 2024, **300**, 107906.
